# Supplementary material for: Analysis of the Ability of Different Allografts to Act as Carrier Grafts for Local Drug Delivery
Source: MDPI journal article supplement (doi:10.3390/jfb14060305), 2023-06-01
Supplement: s1 [file s1]

# Analysis of the Ability of Different Allografts to Act as Carrier Grafts for Local Drug Delivery

Nicole Bormann <sup>1</sup>, Aysha Schmock <sup>1</sup>, Anja Hanke <sup>2</sup>, Volker Eras <sup>2</sup>, Norus Ahmed <sup>2,\*</sup>, Maya S. Kissner <sup>1</sup>, Britt Wildemann <sup>1,3</sup> and Jan C. Brune <sup>2</sup>

<sup>1</sup> Julius Wolff Institut und BIH-Center für Regenerative Therapien und Center, Charité-Universitätsmedizin Berlin, Corporate Member of Freie Universität Berlin, Humboldt-Universität zu Berlin und Berlin Institute of Health, 13353, Berlin, Germany; nicole.bormann@bih-charite.de (N.B.); aysha.bonell@bih-charite.de (A.S.); maya.kissner@web.de (M.S.K.); britt.wildemann@med.uni-jena.de (B.W.)

<sup>2</sup> German Institute for Cell and Tissue Replacement (DIZG, gemeinnützige GmbH), 12555 Berlin, Germany; a\_hanke@dizg.de (A.H.); v\_eras@dizg.de (V.E.); j\_brune@dizg.de (J.C.B.)

<sup>3</sup> Experimental Trauma Surgery, Department of Trauma, Hand and Reconstructive Surgery, Jena University Hospital, Friedrich Schiller University, 07747 Jena, Germany

\* Correspondence: n\_ahmed@dizg.de

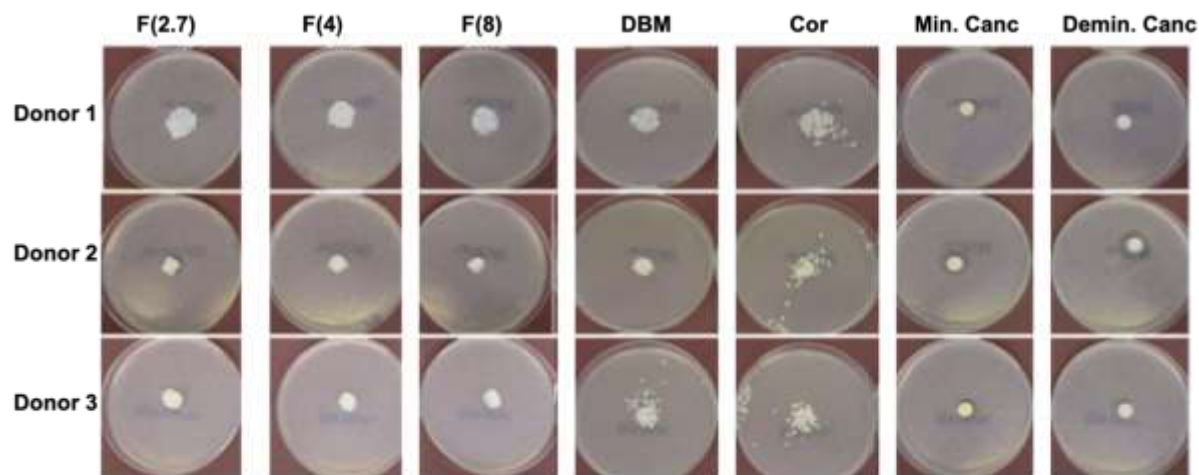

**Supplementary Figure S1.** Zone of inhibition (ZOI) test after 30 minutes of incubation: Gentamicin elution 3 from the respective grafts after 21 days of elution.

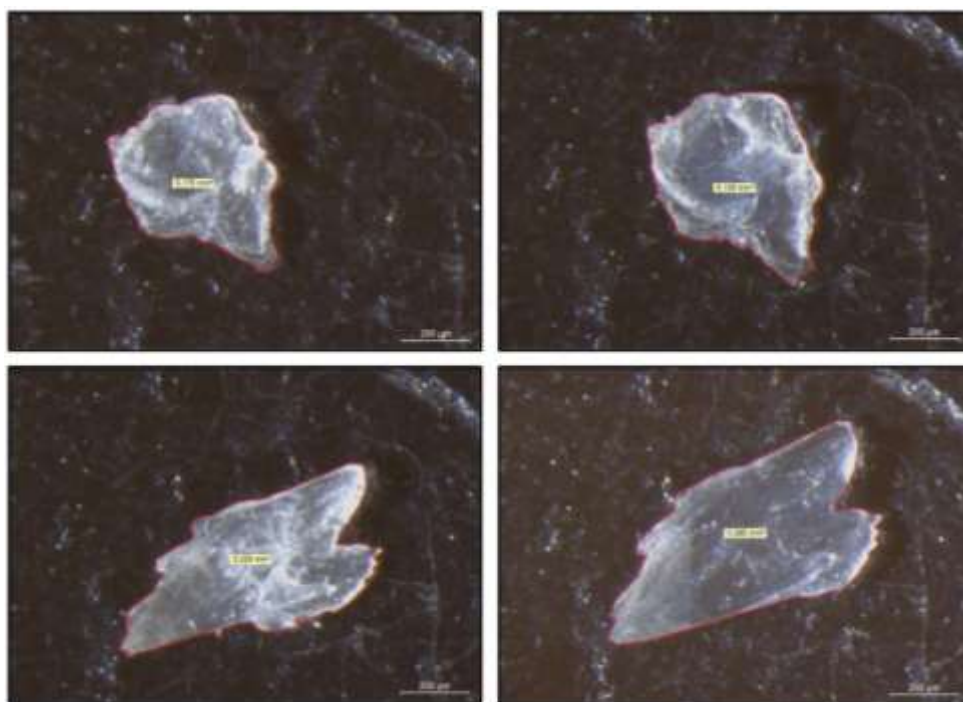

**Supplementary Figure S2:** Microscopy images of DBM particles before (A and C, left) and after (B and D, 23 right) rehydration with water (6.3 x magnification, scale bar = 200  $\mu\text{m}$ ).

**Supplementary Table S1.** *Grafts used for the absorption capacity testing with PBS*

| Group                            | Type          | Dry weight (mg, mean $\pm$ SD) |
|----------------------------------|---------------|--------------------------------|
| Cancellous bone (high density)   | Mineralized   | 216 $\pm$ 29                   |
| Cancellous bone (medium density) | Mineralized   | 126 $\pm$ 3                    |
| Cancellous bone (low density)    | Mineralized   | 61 $\pm$ 6                     |
| Cancellous bone                  | Demineralized | 55 $\pm$ 22                    |
| Cortical granules (1-2 mm)       | Mineralized   | 282 $\pm$ 1                    |
| DBM granules (1-2 mm)            | Demineralized | 106 $\pm$ 1                    |
| Fibrous graft (2.7 ml/g)         | Demineralized | 141 $\pm$ 1                    |
| Fibrous graft (4 ml/g)           | Demineralized | 102 $\pm$ 0                    |

**Supplementary Table S2.** *Grafts used for the gentamicin elution testing*

| Group                      | Type          | Dry weight (mg, mean $\pm$ SD) | Antibiotic addition ( $\mu$ L) |
|----------------------------|---------------|--------------------------------|--------------------------------|
| Cancellous bone            | Mineralized   | 171.4 $\pm$ 22.4               | 2000                           |
| Cancellous bone            | Demineralized | 60.7 $\pm$ 6.8                 | 2000                           |
| Cortical granules (1-2 mm) | Mineralized   | 344.4 $\pm$ 2.9                | 2000                           |
| DBM granules (1-2 mm)      | Demineralized | 104.3 $\pm$ 1.2                | 2000                           |
| Fibrous graft (2.7 ml/g)   | Demineralized | 91.9 $\pm$ 2.4                 | 243                            |
| Fibrous graft (4 ml/g)     | Demineralized | 76.5 $\pm$ 1.1                 | 300                            |
| Fibrous graft (8 ml/g)     | Demineralized | 46.2 $\pm$ 1.8                 | 360                            |

**Supplementary Table S3.** Statistical significance of total fluid absorbed in the matrix (lower part in red) and interstitial spaces (upper part in blue). Given are the exact p-values. Fibrous grafts absorbed significantly more fluid than any other group.

|                                       | Fibrous graft<br>(2.7 ml/g) | Fibrous graft<br>(4 ml/g) | DBM<br>granules<br>(1-2 mm) | Cortical<br>granules<br>(1-2 mm) | Min.<br>Cancellous<br>bone(low<br>density) | Min.<br>Cancellous<br>bone (medium<br>density) | Min.<br>Cancellous<br>bone (high<br>density) | Demin.<br>Cancellous<br>bone |
|---------------------------------------|-----------------------------|---------------------------|-----------------------------|----------------------------------|--------------------------------------------|------------------------------------------------|----------------------------------------------|------------------------------|
| Fibrous graft (2.7 ml/g)              |                             | <0.0001                   | <0.0001                     | <0.0001                          | <0.0001                                    | <0.0001                                        | <0.0001                                      | <0.0001                      |
| Fibrous graft (4 ml/g)                | <0.0001                     |                           | 0.8114                      | 0.9985                           | <0.0001                                    | <0.0001                                        | 0.0071                                       | <0.0001                      |
| DBM granules (1-2 mm)                 | <0.0001                     | <0.0001                   |                             | 0.987                            | <0.0001                                    | <0.0001                                        | 0.1782                                       | <0.0001                      |
| Cortical granules (1-2 mm)            | <0.0001                     | <0.0001                   | <0.0001                     |                                  | <0.0001                                    | <0.0001                                        | 0.0305                                       | <0.0001                      |
| Min. Cancellous bone (low density)    | <0.0001                     | <0.0001                   | <0.0001                     | 0.0003                           |                                            | 0.9997                                         | <0.0001                                      | 0.814                        |
| Min. Cancellous bone (medium density) | <0.0001                     | <0.0001                   | <0.0001                     | 0.4639                           | 0.1176                                     |                                                | 0.0007                                       | 0.6272                       |
| Min. Cancellous bone (high density)   | <0.0001                     | <0.0001                   | <0.0001                     | 0.9998                           | 0.0005                                     | 0.3338                                         |                                              | <0.0001                      |
| Demin. Cancellous bone                | <0.0001                     | <0.0001                   | <0.0001                     | 0.0004                           | <0.0001                                    | <0.0001                                        | 0.0043                                       |                              |

**Supplementary Table S4.** Statistical significance of gentamicin elution by different bony grafts over a 21-day period. Given are the exact p-values. No significant differences were observed after day 7. ns: not significant ( $p > 0.05$ ); F(2.7): Fibrous graft 2.7 ml/g, F(4): Fibrous graft 4 ml/g; F(8): Fibrous graft 8 ml/g; Cor: cortical granules; Min. Canc: cancellous bone; DBM: demineralized bone matrix; Demin. Canc: demineralized cancellous bone.

| Parameters             | 1h     | 4h     | 1d     | 2d     | 3d     | 4d     | 7d     |
|------------------------|--------|--------|--------|--------|--------|--------|--------|
| F(2.7) vs. F(4)        | ns     |
| F(2.7) vs. F(8)        | 0.0166 | ns     | ns     | ns     | 0.0207 | 0.0069 | 0.0365 |
| F(2.7) vs. DBM         | ns     | 0.0041 | ns     | ns     | 0.0209 | ns     | ns     |
| F(2.7) vs. Cor         | ns     | 0.0006 | ns     | ns     | 0.0268 | 0.0009 | 0.0419 |
| F(2.7) vs. Min. Canc   | ns     | ns     | ns     | ns     | 0.0465 | ns     | ns     |
| F(2.7) vs. Demin. Canc | ns     | 0.0046 | ns     | ns     | 0.0142 | 0.0003 | ns     |
| F(4) vs. F(8)          | 0.0297 | ns     | 0.0321 | 0.03   | 0.0156 | 0.042  | 0.0229 |
| F(4) vs. DBM           | ns     | 0.0021 | 0.0322 | 0.0339 | ns     | ns     | ns     |
| F(4) vs. Cor           | ns     | 0.0007 | 0.0372 | 0.0398 | 0.0248 | 0.0353 | 0.0089 |
| F(4) vs. Min. Canc     | ns     | 0.0319 | 0.0488 | ns     | ns     | ns     | ns     |
| F(4) vs. Demin. Canc   | ns     | 0.0027 | 0.0338 | 0.0216 | 0.0244 | ns     | 0.0143 |
| F(8) vs. DBM           | ns     |
| F(8) vs. Cor           | 0.0193 | ns     | ns     | ns     | ns     | ns     | ns     |
| F(8) vs. Min. Canc     | 0.0343 | ns     | ns     | ns     | 0.0292 | ns     | ns     |
| F(8) vs. Demin. Canc   | ns     |
| DBM vs. Cor            | ns     |
| DBM vs. Min. Canc      | ns     |
| DBM vs. Demin. Canc    | ns     |
| Cor vs. Min. Canc      | ns     | ns     | ns     | 0.0147 | 0.0075 | ns     | ns     |
| Cor vs. Demin. Canc    | ns     |
| Can vs. Demin. Canc    | ns     |

**Supplementary Table S5.** Statistical significance of ZOI testing with different bony grafts over a 21-day period. Given are the exact p-values. No significant differences were observed after day 3. ns: not significant ( $p > 0.05$ ); F(2.7): Fibrous graft 2.7 ml/g, F(4): Fibrous graft 4 ml/g; F(8): Fibrous graft 8 ml/g; Cor: cortical granules; Min. Canc: cancellous bone; DBM: demineralized bone matrix; Demin. Canc: demineralized cancellous bone.

| Parameters | 1h | 4h | 1d | 2d | 3d |
|------------|----|----|----|----|----|
|------------|----|----|----|----|----|

|                        |    |        |        |       |        |
|------------------------|----|--------|--------|-------|--------|
| F(2.7) vs. F(4)        | ns | ns     | ns     | ns    | ns     |
| F(2.7) vs. F(8)        | ns | ns     | 0.0379 | ns    | 0.0137 |
| F(2.7) vs. DBM         | ns | 0.0033 | 0.0028 | ns    | ns     |
| F(2.7) vs. Cor         | ns | ns     | 0.0231 | 0.027 | 0.0137 |
| F(2.7) vs. Min. Canc   | ns | ns     | 0.0468 | ns    | ns     |
| F(2.7) vs. Demin. Canc | ns | ns     | ns     | ns    | 0.0137 |
| F(4) vs. F(8)          | ns | ns     | 0.0489 | ns    | 0.0142 |
| F(4) vs. DBM           | ns | 0.0021 | 0.0063 | ns    | ns     |
| F(4) vs. Cor           | ns | ns     | 0.0244 | ns    | ns     |
| F(4) vs. Min. Canc     | ns | ns     | ns     | ns    | ns     |
| F(4) vs. Demin. Canc   | ns | ns     | ns     | ns    | 0.0142 |
| F(8) vs. DBM           | ns | ns     | ns     | ns    | ns     |
| F(8) vs. Cor           | ns | ns     | ns     | ns    | 0      |
| F(8) vs. Min. Canc     | ns | ns     | ns     | ns    | 0.0275 |
| F(8) vs. Demin. Canc   | ns | ns     | ns     | ns    | ns     |
| DBM vs. Cor            | ns | ns     | ns     | ns    | ns     |
| DBM vs. Min. Canc      | ns | 0.0487 | ns     | ns    | ns     |
| DBM vs. Demin. Canc    | ns | 0.0387 | ns     | ns    | ns     |
| Cor vs. Min. Canc      | ns | ns     | ns     | ns    | 0.0275 |
| Cor vs. Demin. Canc    | ns | ns     | ns     | ns    | ns     |
| Can vs. Demin. Canc    | ns | ns     | ns     | ns    | 0.0275 |

**Supplementary Table S6.** Statistical significance of gentamicin elution of Fibrous graft 2.7 ml/g with different incubation times over a 21-day period. Given are the exact p-values. No significant differences were observed after day 1. ns: not significant ( $p > 0.05$ ).

| Parameters        | 1h      | 4h     | 1d     | 2d |
|-------------------|---------|--------|--------|----|
| 5 min vs. 10 min  | <0.0001 | 0.0063 | ns     | ns |
| 5 min vs. 20 min  | ns      | ns     | ns     | ns |
| 5 min vs. 30 min  | <0.0001 | 0.036  | 0.0003 | ns |
| 10 min vs. 20 min | <0.0001 | ns     | ns     | ns |
| 10 min vs. 30 min | ns      | ns     | 0.0014 | ns |
| 20 min vs. 30 min | <0.0001 | ns     | 0.0058 | ns |
